# Supplementary material
Source: PubMed Central journal article supplement (PMC4788746)
Supplement: mmc1.pdf [file mmc1.pdf]

**Biophysical Journal, Volume 110**

**Supplemental Information**

**Oncogenic K-Ras Binds to an Anionic Membrane in Two Distinct Orientations: A Molecular Dynamics Analysis**

**Priyanka Prakash, Yong Zhou, Hong Liang, John F. Hancock, and Alemayehu A. Gorfe**

## SUPPLEMENTARY DATA

### **Oncogenic K-Ras binds to an anionic membrane in two distinct orientations: A molecular dynamics analysis**

*Priyanka Prakash, Yong Zhou, Hong Liang, John F. Hancock and Alemayehu A. Gorfe\**

University of Texas Health Science Center at Houston, Department of Integrative Biology and  
Pharmacology, 6431 Fannin St., Houston, Texas 77030

\*Corresponding author: Tel: 713-500-7538; Fax: 713-500-7444;  
E-mail: [Alemayehu.G.Abebe@uth.tmc.edu](mailto:Alemayehu.G.Abebe@uth.tmc.edu)

#### Keywords:

K-Ras, molecular dynamics, orientation state, GTPase, lipid bilayer membrane

Running Title: Oncogenic K-Ras membrane interaction

**Movie S1:** A movie showing the transition from one orientation state (OS1) to another (OS2). The movie was generated from one of the Nocmap-K-Ras simulations (panel 3 of Figure 2B in the main text), which is the only trajectory that underwent such a transition. The "toehold" region comprising the C-terminus of helix-3 and loop7 is shown in purple, helices 3 and 4 are green, and strands  $\beta$ 1-3 and helix 2 are in orange. The residues in licorice are those within 4 Å of the bilayer (gray lines). The elements in licorice are colored as follows: nitrogen (blue), oxygen (red), carbon (cyan), sulphur (yellow).

**Movie S2:** A movie showing the "rocking" motion via the "toehold" in a NormK-Ras simulation (panel 4 of Figure 2A in the main text). Color scheme is the same as in S1.

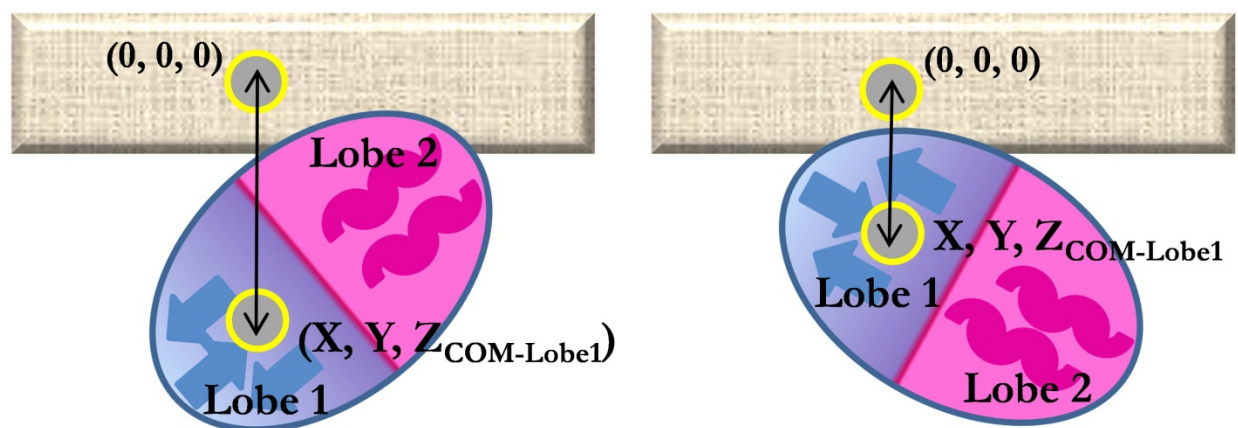

**Figure S1:** A schematic illustration of one of the two reaction coordinates used in this paper,  $Z_{\text{COM-lobe1}}$ , defined as the z-coordinate of the center of mass of lobe1 (residues 1-86) of K-Ras after aligning the bilayer center at the origin. The bilayer (rectangle) is centered at the origin so that  $Z_{\text{COM-Lobe1}}$  measures the displacement of lobe 1 (in blue) to and away from the bilayer.  $Z_{\text{COM-Lobe2}}$  was defined similarly to monitor the displacement of lobe 2 (pink) along the membrane normal.

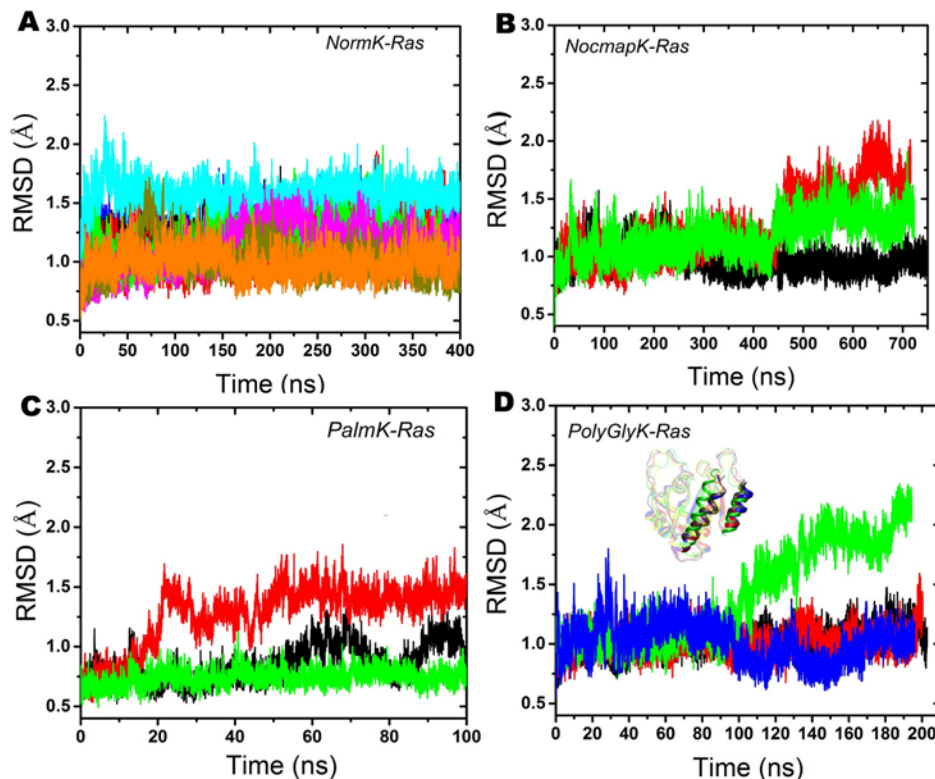

**Figure S2:** Backbone root mean square deviation (RMSD) of the catalytic domain during (A) eight NormK-Ras simulations where the CD makes direct contact with the bilayer, (B) three NocmapK-Ras simulations, (C) three PalmK-Ras simulations, and (D) four PolyGlyK-Ras simulations. The inset in (D) shows an overlay of the last snapshot from the four runs, highlighting the significant conformational change of helix 3 in one of them. The flexible residues of switch 1 (25-40), switch 2 (57-75) and the HVR (residues 169-185) were excluded. The equilibrated structure was used as a reference in each case except the following. As mentioned in Methods of the main text, the NormK-Ras simulations consisted of two sub-groups, where in one group PG to PS replacement was performed without a short no-CMAP MD relaxation whereas in the other PG to PS replacement was done after a 20 ns relaxation without CMAP. In the latter, the backbone RMSD using the initial structure as a reference was relatively large (1.8-2.5 Å) due to conformational changes prior to the application of CMAP; this was confirmed by the finding that using the crystal structure as a reference reduced the RMSD to about 1.2 Å within the first 20 ns. Therefore, we regarded the 25 ns snapshot as a better-equilibrated reference structure for this sub-group of simulations.

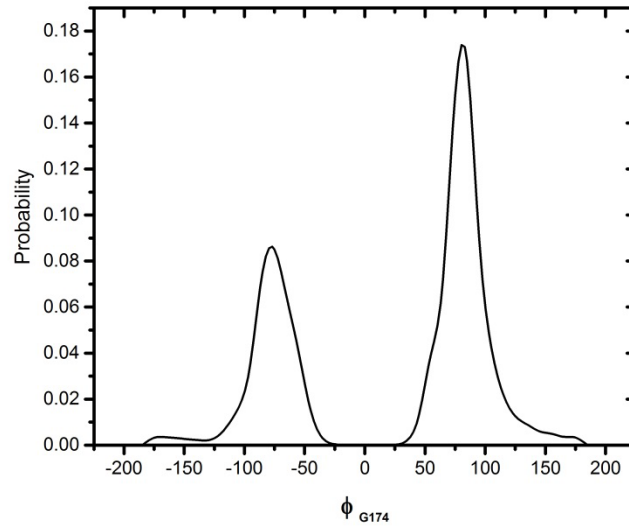

**Figure S3:** Distribution of the dihedral angle  $\phi$  of Gly74 among conformers in which the catalytic domain makes direct contact with the bilayer, derived from only the NormK-Ras simulations.

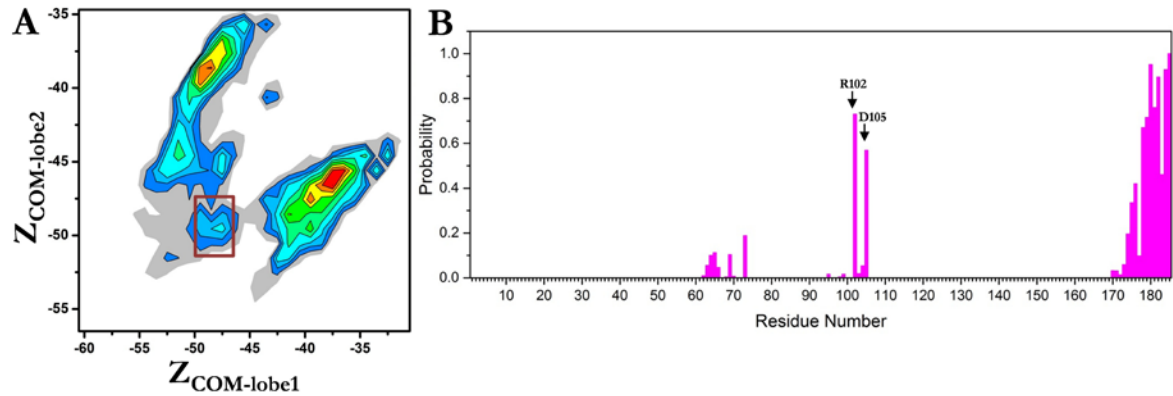

**Figure S4: A putative intermediate orientation state.** (A) Population density plot highlighting a putative intermediate orientation (purple box) identified by the  $P(Z_{\text{COM-lobe1}}, Z_{\text{COM-lobe2}})$  analysis described in the main text. (B) Normalized probability distribution of bilayer contact of K-Ras residues in the intermediate state. The data was derived from the NormK-Ras simulations.

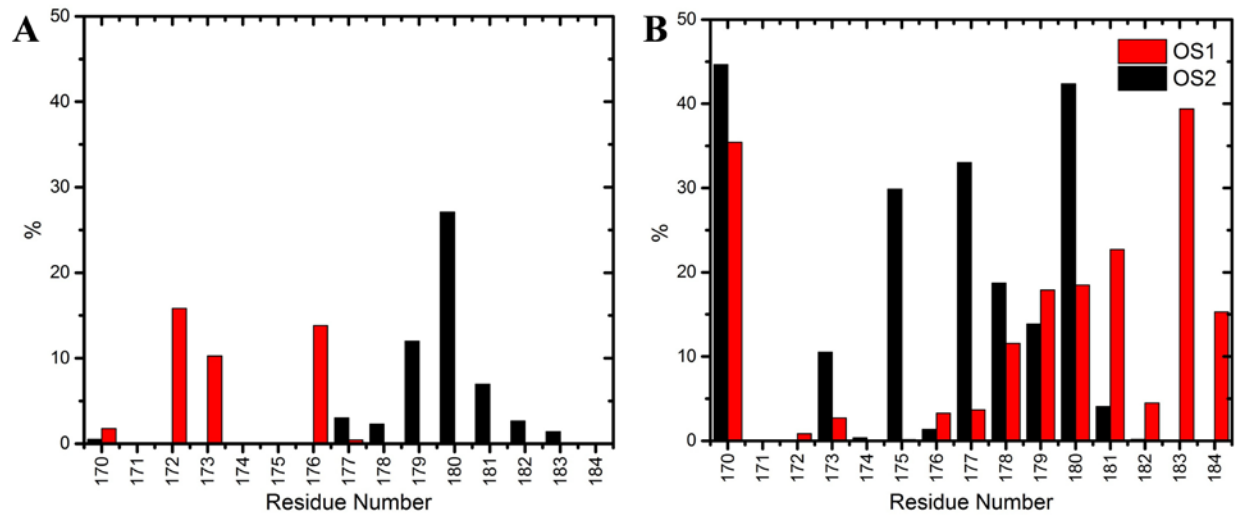

**Figure S5: HVR-core interactions.** Shown are percentages (y-axis) of cumulative heavy atom contacts made by individual HVR residues (x-axis) with residues on the surface of the  $\beta 1$ - $\beta 3$  region (**A**) and loop 7 (**B**) in OS1 (red) and OS2 (black).
